# Supplementary figures and images for: Comparison of nested case-control and survival analysis methodologies for analysis of time-dependent exposure
Source: Springer Nature journal article supplement (doi:10.1186/1471-2288-5-5), 2005-01-25

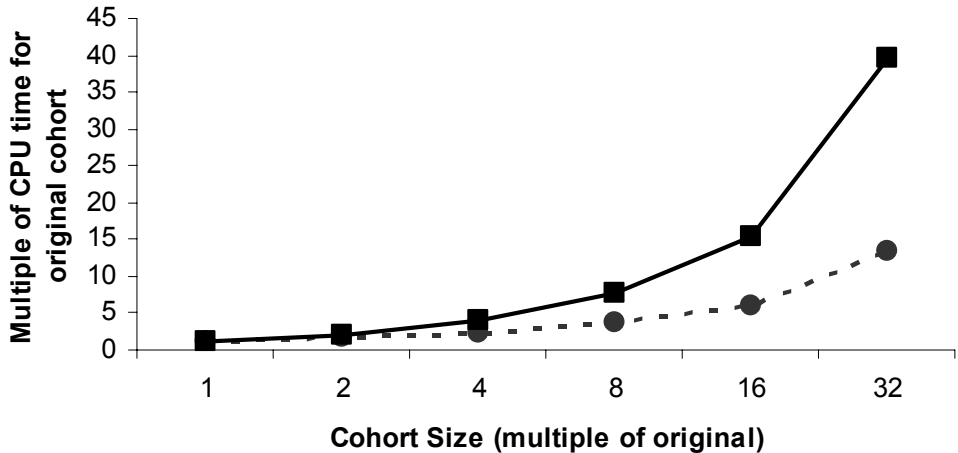

- -●- - Nested: 4 Controls per Case    -■- Survival Analysis

Supplement: 12874_2004_93_MOESM1_ESM.pdf [file 12874_2004_93_MOESM1_ESM.pdf]
